# Supplementary material
Source: publisher site journal article supplement (https://en-cdn.bio-protocol.org/attached/file/20171210/2665%20Supplemental%20file%201.docx)
Supplement: Supplementary file 1 [file 2665%20Supplemental%20file%201.docx]

**The sequence of pBaitD-gap43-linker-EGFP (3,788 bp)**

・BaitD (1-23 and 2011-2033)

・Restriction enzyme site: *Xho*I (24-29), *Bam*HI (515-520), *Eco*RI (1,503-1,508), *Spe*I (2,005-2,010)

・Homology arms: Left arm (30-514), Right arm (1,509-2,004)

・Linker (521-538)

・EGFP (539-1258)

・PolyA (1,275-1,502)

・pUC ori (2,034-2,702)

・Ampicillin resistance (2,703-3,788)

1 GATCTTCGGCCTAGACTGCGAGGCTCGAGGAACATCTCAGTCTAAGACTCCATTTTTCTT

61 AGCAAATGTACATTATAGCTACAAAAGGTTCCTCTGGACCCACATGACTGCTGCTAGCAG

121 CTAATATTCTGTACTGTGTGTTGTTCATCAGGTGGAGAAAAATGAGGATGCAGACCAGAA

181 GATTGAGCAGGATGGCACCGCCAACAAACCCGAGGACAACAAGGCCCACAAGGCAGCCAC

241 CAAAATACAGGCTAGCTTCCGTGGACACATAACTCGGAAAAAGATGAAAGACGGAGAGGA

301 GGAGAAGGAAGAAAACAGTCCTGTTGCAGATGAGGCAAAAGAGAGAGAAGAGGAGACAAA

361 GAAAGCAGAGGGAGATGAGACACCTGCTAAGCAGGATGAAGCTGCAGGAGAGGAGGCGAA

421 GGAAGAGTTAAACCAAGCCAAAAGCCCTGCAGCAGACAAACCAGCTAACTCTCCGGCAGC

481 TGCTGTCTCTCCTGCAGGCGCAGCCACTTCTCCCGGATCCGGAGGTAGCGGTGGAACTAT

541 GGTGAGCAAGGGCGAGGAGCTGTTCACCGGGGTGGTGCCCATCCTGGTCGAGCTGGACGG

601 CGACGTAAACGGCCACAAGTTCAGCGTGTCCGGCGAGGGCGAGGGCGATGCCACCTACGG

661 CAAGCTGACCCTGAAGTTCATCTGCACCACCGGCAAGCTGCCCGTGCCCTGGCCCACCCT

721 CGTGACCACCCTGACCTACGGCGTGCAGTGCTTCAGCCGCTACCCCGACCACATGAAGCA

781 GCACGACTTCTTCAAGTCCGCCATGCCCGAAGGCTACGTCCAGGAGCGCACCATCTTCTT

841 CAAGGACGACGGCAACTACAAGACCCGCGCCGAGGTGAAGTTCGAGGGCGACACCCTGGT

901 GAACCGCATCGAGCTGAAGGGCATCGACTTCAAGGAGGACGGCAACATCCTGGGGCACAA

961 GCTGGAGTACAACTACAACAGCCACAACGTCTATATCATGGCCGACAAGCAGAAGAACGG

1,021 CATCAAGGTGAACTTCAAGATCCGCCACAACATCGAGGACGGCAGCGTGCAGCTCGCCGA

1,081 CCACTACCAGCAGAACACCCCCATCGGCGACGGCCCCGTGCTGCTGCCCGACAACCACTA

1,141 CCTGAGCACCCAGTCCGCCCTGAGCAAAGACCCCAACGAGAAGCGCGATCACATGGTCCT

1,201 GCTGGAGTTCGTGACCGCCGCCGGGATCACTCTCGGCATGGACGAGCTGTACAAGTAAAG

1,261 CGGCCGCGACTCTAGATCATAATCAGCCATACCACATTTGTAGAGGTTTTACTTGCTTTA

1,321 AAAAACCTCCCACACCTCCCCCTGAACCTGAAACATAAAATGAATGCAATTGTTGTTGTT

1,381 AACTTGTTTATTGCAGCTTATAATGGTTACAAATAAAGCAATAGCATCACAAATTTCACA

1,441 AATAAAGCATTTTTTTCACTGCATTCTAGTTGTGGTTTGTCCAAACTCATCAATGTATCT

1,501 TAGAATTCCTGTGGCGCCGGCTCCATCTGCTCCTACAACTGCCACGGCGCCCTCTGAACC

1,561 TGAGAAAGAGGAGCCGAAGGAGAAGCCCAAAGAGGTGGAGGCTCCAGCTGCAACAACCAA

1,621 GAGTCCCACCACAGCCACAGCTGAGGAGAAGAAGGAGGAGGAGAAAAAGTGGGAGGAGAA

1,681 GAAGGAGGAGGCCAGACAAGCCGATGTGCCTGCTGCTGTCAGCCCAACAGCTGAGGAAGA

1,741 ACCTAACCAAACAAAAGATCAACAAGGTATGCCGATTACAGCGCTCCAGTTAAGCCTTGG

1,801 TCACATGACCGGTATGGGTGCTACAGTTTTTTTGGTTATCCGGGCCCATAGAGGGTCATA

1,861 GAGAAGAGTGGCTGCATCCTAAGGGGAGAGCAGGTGTGTCTTGCAGTTTCCTTTAGGGTC

1,921 CTACAACCAACTTAAGGGACTTTATGAAAATGGAACAAACCTTTGTCGTGCATGTGGTAA

1,981 GTGTATAGTGAAGCATTTATAAGGACTAGTCCTCGCAGTCTAGGCCGAAGATCAGCAAAA

2,041 GGCCAGCAAAAGGCCAGGAACCGTAAAAAGGCCGCGTTGCTGGCGTTTTTCCATAGGCTC

2,101 CGCCCCCCTGACGAGCATCACAAAAATCGACGCTCAAGTCAGAGGTGGCGAAACCCGACA

2,161 GGACTATAAAGATACCAGGCGTTTCCCCCTGGAAGCTCCCTCGTGCGCTCTCCTGTTCCG

2,221 ACCCTGCCGCTTACCGGATACCTGTCCGCCTTTCTCCCTTCGGGAAGCGTGGCGCTTTCT

2,281 CATAGCTCACGCTGTAGGTATCTCAGTTCGGTGTAGGTCGTTCGCTCCAAGCTGGGCTGT

2,341 GTGCACGAACCCCCCGTTCAGCCCGACCGCTGCGCCTTATCCGGTAACTATCGTCTTGAG

2,401 TCCAACCCGGTAAGACACGACTTATCGCCACTGGCAGCAGCCACTGGTAACAGGATTAGC

2,461 AGAGCGAGGTATGTAGGCGGTGCTACAGAGTTCTTGAAGTGGTGGCCTAACTACGGCTAC

2,521 ACTAGAAGAACAGTATTTGGTATCTGCGCTCTGCTGAAGCCAGTTACCTTCGGAAAAAGA

2,581 GTTGGTAGCTCTTGATCCGGCAAACAAACCACCGCTGGTAGCGGTGGTTTTTTTGTTTGC

2,641 AAGCAGCAGATTACGCGCAGAAAAAAAGGATCTCAAGAAGATCCTTTGATCTTTTCTACG

2,701 GGCCCGGGAGGCCTGTCTGACGCTCAGTGGAACGAAAACTCACGTTAAGGGATTTTGGTC

2,761 ATGAGACAATAACCCTGATAAATGCTTCAATAATATTGAAAAAGGAAGAGTATGAGTATT

2,821 CAACATTTCCGTGTCGCCCTTATTCCCTTTTTTGCGGCATTTTGCCTTCCTGTTTTTGCT

2,881 CACCCAGAAACGCTGGTGAAAGTAAAAGATGCTGAAGATCAGTTGGGTGCACGAGTGGGT

2,941 TACATCGAACTGGATCTCAACAGCGGTAAGATCCTTGAGAGTTTTCGCCCCGAAGAACGT

3,001 TTTCCAATGATGAGCACTTTTAAAGTTCTGCTATGTGGCGCGGTATTATCCCGTATTGAC

3,061 GCCGGGCAAGAGCAACTCGGTCGCCGCATACACTATTCTCAGAATGACTTGGTTGAGTAC

3,121 TCACCAGTCACAGAAAAGCATCTTACGGATGGCATGACAGTAAGAGAATTATGCAGTGCT

3,181 GCCATAACCATGAGTGATAACACTGCGGCCAACTTACTTCTGACAACGATCGGAGGACCG

3,241 AAGGAGCTAACCGCTTTTTTGCACAACATGGGGGATCATGTAACTCGCCTTGATCGTTGG

3,301 GAACCGGAGCTGAATGAAGCCATACCAAACGACGAGCGTGACACCACGATGCCTGTAGCA

3,361 ATGGCAACAACGTTGCGCAAACTATTAACTGGCGAACTACTTACTCTAGCTTCCCGGCAA

3,421 CAATTAATAGACTGGATGGAGGCGGATAAAGTTGCAGGACCACTTCTGCGCTCGGCCCTT

3,481 CCGGCTGGCTGGTTTATTGCTGATAAATCTGGAGCCGGTGAGCGTGGGTCTCGCGGTATC

3,541 ATTGCAGCACTGGGGCCAGATGGTAAGCCCTCCCGTATCGTAGTTATCTACACGACGGGG

3,601 AGTCAGGCAACTATGGATGAACGAAATAGACAGATCGCTGAGATAGGTGCCTCACTGATT

3,661 AAGCATTGGTAACTGTCAGACCAAGTTTACTCATATATACTTTAGATTGATTTAAAACTT

3,721 CATTTTTAATTTAAAAGGATCTAGGTGAAGATCCTTTTTGATAATCTCATGAGCGGATAC

3,781 ACGTAGTG
